# Supplementary material for: Adaptive substitutions underlying cardiac glycoside insensitivity in insects exhibit epistasis in vivo
Source: eLife journal article supplement (doi:10.7554/elife.48224), 2019-08-27
Supplement: supp [file elife-48224-supp-v1.zip]

**Figure 1 - figure supplement 2. Summary of amino acid variation at sites implicated in cardenolide-sensitivity in ATPα1 in surveyed species**

|                            | 1 | 1 | 1 | 1 | 1 | 1 | 1 | 1 | 1 | 1 | 1 | 1 | 3 | 3 | 3 | 3 | 3 | 3 | 3 | 3 | 3 | 3 | 6 | 7 | 7 | 7 | 7 | 7 | 8 | 8 | 8 | 8 | 8 | 8 | 9 | 9 |   |   |   |   |   |             |           |   |   |
|----------------------------|---|---|---|---|---|---|---|---|---|---|---|---|---|---|---|---|---|---|---|---|---|---|---|---|---|---|---|---|---|---|---|---|---|---|---|---|---|---|---|---|---|-------------|-----------|---|---|
| Position                   | 0 | 0 | 1 | 1 | 1 | 1 | 1 | 1 | 1 | 2 | 2 | 2 | 0 | 1 | 1 | 1 | 1 | 2 | 2 | 2 | 3 | 3 | 3 | 6 | 5 | 7 | 8 | 8 | 8 | 9 | 9 | 0 | 0 | 6 | 7 | 8 | 8 | 9 | 7 | 8 |   |             |           |   |   |
| Reference sequence         | C | Y | Q | A | T | V | E | E | P | A | D | D | N | Y | D | V | I | F | G | V | A | N | L | A | T | C | A | P | F | F | I | L | T | C | D | F | L | R | K | E | R | L           |           |   |   |
| Species                    |   |   |   |   |   |   |   |   |   |   |   |   |   |   |   |   |   |   |   |   |   |   |   |   |   |   |   |   |   |   |   |   |   |   |   |   |   |   |   |   |   | specialists | outgroups |   |   |
| Orthoptera                 |   |   |   |   |   |   |   |   |   |   |   |   |   |   |   |   |   |   |   |   |   |   |   |   |   |   |   |   |   |   |   |   |   |   |   |   |   |   |   |   |   | 6           | 9         |   |   |
| Gryllus firmus             | . | . | . | . | . | . | D | . | S | . | . | . | . | . | . | . | . | . | . | . | . | . | . | . | . | . | . | . | . | . | . | . | . | . | . | . | . | . | . | . | . | .           | .         |   |   |
| Tetrix japonica            | . | . | . | . | . | . | . | . | . | . | . | . | . | . | . | . | . | . | . | . | . | . | . | . | . | . | . | . | . | . | . | . | . | . | . | . | . | . | . | . | . | .           | .         |   |   |
| Romalea microptera         | . | . | L | . | . | . | . | . | S | . | . | . | . | . | . | . | . | . | . | . | . | . | . | . | . | . | . | . | . | . | . | . | . | . | . | . | . | . | . | . | . | .           | .         |   |   |
| Oedaleus asiaticus         | . | . | L | . | . | . | . | . | S | . | . | . | . | . | . | . | . | . | . | . | . | . | . | . | . | . | . | . | . | . | . | . | . | . | . | . | . | . | . | . | . | .           | .         |   |   |
| Locusta migratoria         | . | . | L | . | . | . | . | . | S | . | . | . | . | . | . | . | . | . | . | . | . | . | . | . | . | . | . | . | . | . | . | . | . | . | . | . | . | . | . | . | . | .           | .         |   |   |
| Aularches miliaris         | . | . | L | . | . | . | . | . | S | . | . | . | . | . | . | . | . | . | . | . | . | . | . | . | . | . | . | . | . | . | . | . | . | . | . | . | . | . | . | . | . | .           | .         |   |   |
| Taphronota calliparea      | . | . | L | . | . | . | . | . | S | . | . | . | . | . | . | . | . | . | . | . | . | . | . | . | . | . | . | . | . | . | . | . | . | . | . | . | M | . | . | . | . | .           | .         |   |   |
| Dictyophorus griseus       | . | . | L | . | . | . | . | . | S | . | . | . | . | . | . | . | . | . | . | . | . | . | . | . | . | . | . | . | . | . | . | . | . | . | . | . | . | . | . | . | . | .           | .         |   |   |
| Chrotogonus hemipterus     | . | . | L | . | . | . | . | . | S | . | . | . | . | . | . | . | . | . | . | . | . | . | . | . | . | . | . | . | . | . | . | . | . | . | . | . | . | . | . | . | . | .           | .         |   |   |
| Atractomorpha acutipennis  | . | . | L | . | . | . | . | . | S | . | . | . | . | . | . | . | . | . | . | . | . | . | . | . | . | . | . | . | . | . | . | . | . | . | . | . | . | . | . | . | . | .           | .         |   |   |
| Sphenarium purpurascens    | . | . | L | . | . | . | . | . | S | . | . | . | . | . | . | . | . | . | . | . | . | . | . | . | . | . | . | . | . | . | . | . | . | . | . | . | M | . | . | . | . | .           | .         |   |   |
| Ochrophlebia cafra         | . | . | L | . | . | . | . | . | S | . | . | . | . | . | . | . | . | . | . | . | . | . | . | . | . | . | . | . | . | . | . | . | . | . | . | . | . | . | . | . | . | .           | .         |   |   |
| Zonocerus elegans          | . | . | L | . | . | . | . | . | S | . | . | . | . | . | . | . | . | . | . | . | . | . | . | . | . | . | . | . | . | . | . | . | . | . | . | . | . | . | . | . | . | .           | .         |   |   |
| Poecilocerius pictus B     | . | . | L | . | . | . | . | . | S | . | . | . | . | . | . | . | . | . | . | . | . | . | . | . | . | . | . | . | . | . | . | . | . | . | . | . | . | . | . | . | . | .           | .         |   |   |
| Phymateus leprosus B       | . | . | L | . | . | . | . | . | S | . | . | . | . | . | . | . | . | . | . | . | . | . | . | . | . | . | . | . | . | . | . | . | . | . | . | . | . | . | . | . | . | .           | .         |   |   |
| Poecilocerius pictus A     | . | . | L | . | . | T | . | . | S | S | . | . | H | . | . | V | . | . | . | . | . | . | . | . | . | . | . | . | . | M | . | . | . | . | . | . | . | . | . | . | . | .           | .         |   |   |
| Phymateus leprosus A       | . | . | L | . | . | T | . | . | S | T | E | N | H | . | . | V | . | . | . | . | . | . | . | . | . | . | . | . | . | M | . | . | . | . | . | M | . | . | . | . | . | .           | .         |   |   |
| Mantodea                   |   |   |   |   |   |   |   |   |   |   |   |   |   |   |   |   |   |   |   |   |   |   |   |   |   |   |   |   |   |   |   |   |   |   |   |   |   |   |   |   |   | 0           | 1         |   |   |
| Mantis religiosa           | . | . | . | . | . | . | . | . | . | . | . | . | . | . | . | . | . | . | . | . | . | . | . | . | . | . | . | . | . | . | . | . | . | . | . | . | . | . | . | . | . | .           | .         |   |   |
| Hemiptera                  |   |   |   |   |   |   |   |   |   |   |   |   |   |   |   |   |   |   |   |   |   |   |   |   |   |   |   |   |   |   |   |   |   |   |   |   |   |   |   |   |   | 4           | 16        |   |   |
| Bemisia tabaci             | . | . | E | S | . | I | . | . | . | . | . | . | E | . | . | . | . | . | . | . | . | . | . | . | . | . | . | V | . | V | . | . | . | M | . | . | . | . | . | . | . | .           |           |   |   |
| Nilaparvata lugens         | . | . | . | . | . | . | . | . | . | . | . | . | . | . | . | . | . | . | . | . | . | . | . | . | . | . | . | . | . | . | . | . | . | . | . | . | M | . | . | . | . | .           | .         |   |   |
| Rhodnius prolixus          | . | . | . | . | . | . | . | . | S | . | . | . | . | . | . | . | . | . | . | . | . | . | . | . | . | . | . | . | . | . | . | . | . | . | . | M | . | . | . | . | . | .           | .         |   |   |
| Lygus hesperus             | . | . | . | . | . | . | . | . | . | . | . | . | . | . | . | . | . | . | . | . | . | . | . | . | . | . | . | . | . | . | . | . | . | . | . | . | T | . | . | . | . | .           | .         |   |   |
| Cimex lectularius          | . | . | . | . | . | . | . | . | S | . | . | . | . | . | . | . | . | . | . | . | . | . | . | . | . | . | . | . | . | . | . | . | . | . | . | M | . | . | . | . | . | .           | .         |   |   |
| Boisea trivittata          | . | . | . | . | . | . | . | . | S | . | . | . | . | . | . | . | . | . | . | . | . | . | . | . | . | . | . | . | . | . | . | . | . | . | . | . | T | . | . | . | . | .           | .         |   |   |
| Leptocoris trivittatus     | . | . | . | . | . | . | . | . | S | . | . | . | . | . | . | . | . | . | . | . | . | . | . | . | . | . | . | . | . | . | . | . | . | . | . | . | T | . | . | . | . | .           | .         |   |   |
| Pyrrhocoris apterus        | . | . | . | . | . | . | . | . | S | . | . | . | . | . | . | . | . | . | . | . | . | . | . | . | . | . | . | . | . | . | . | . | . | . | . | - | - | - | - | - | - | -           | -         |   |   |
| Dysdercus cingulatus       | . | . | . | . | . | . | . | . | S | . | . | . | . | . | . | . | . | . | . | . | . | . | . | . | . | . | . | . | . | . | . | . | . | . | . | M | . | . | . | . | . | .           | .         |   |   |
| Dysdercus fasciatus        | . | . | . | . | . | . | . | . | S | . | . | . | . | . | . | . | . | . | . | . | . | . | . | . | . | . | . | . | . | . | . | . | . | . | . | M | . | . | . | . | . | .           | .         |   |   |
| Macrocheraia grandis       | . | . | E | T | . | . | . | . | S | . | . | . | . | . | . | . | . | . | . | . | . | . | . | . | . | . | . | . | . | . | . | . | . | . | . | M | . | . | . | . | . | .           | .         |   |   |
| Largus californicus        | . | . | E | T | . | . | . | . | S | . | . | . | . | . | . | . | . | . | . | . | . | . | . | . | . | . | . | . | . | . | . | . | . | . | . | M | . | . | . | . | . | .           | .         |   |   |
| Largus sp.                 | . | . | E | T | . | . | . | . | S | . | . | . | . | . | . | . | . | . | . | . | . | . | . | . | . | . | . | . | . | . | . | . | . | . | . | - | - | - | - | - | - | -           | -         |   |   |
| Jalysus sp                 | . | . | . | . | . | . | . | . | S | . | . | . | . | . | . | . | . | . | . | . | . | . | . | . | . | . | . | . | . | . | . | . | . | . | . | K | . | . | . | . | . | .           | .         |   |   |
| Metatropis rufescens       | . | . | . | . | . | . | . | . | S | . | . | . | . | . | . | . | . | . | . | . | . | . | . | . | . | . | . | . | . | . | . | . | . | . | . | M | . | . | . | . | . | .           | .         |   |   |
| Ischnodemus falcis         | . | . | . | . | . | . | . | . | . | . | . | . | . | . | . | . | . | . | . | . | . | . | . | . | . | . | . | . | . | . | . | . | . | . | . | M | . | . | . | . | . | .           | .         |   |   |
| Gyndes sp                  | . | . | . | . | . | . | . | . | S | . | . | . | . | . | . | . | . | . | . | . | . | . | . | . | . | . | . | . | . | . | . | . | . | . | . | M | . | . | . | . | . | .           | .         |   |   |
| Geocoris sp                | . | . | . | . | . | . | . | . | S | . | . | . | . | . | . | . | . | . | . | . | . | . | . | . | . | . | . | . | . | . | . | . | . | . | . | R | . | . | . | . | . | .           | .         |   |   |
| Oncopeltus fasciatus D     | . | . | . | . | . | . | . | . | S | . | . | H | . | . | . | . | . | . | . | . | . | . | . | . | . | . | . | . | . | . | . | . | . | . | . | V | . | . | . | . | . | .           | .         |   |   |
| Oncopeltus fasciatus C     | . | . | . | . | . | . | . | . | S | . | . | H | . | . | . | . | . | . | . | . | . | . | . | . | . | . | . | . | M | . | S | . | . | . | M | . | . | . | . | . | . | .           |           |   |   |
| Lygaeus kalmii C           | . | . | . | . | . | . | . | . | S | . | . | H | . | . | . | . | . | . | . | . | . | . | . | . | . | . | . | . | M | . | S | . | . | . | M | . | . | . | . | . | . | .           |           |   |   |
| Oncopeltus fasciatus B     | . | . | T | S | . | E | . | . | S | S | . | H | . | . | V | . | . | . | . | . | . | . | . | . | . | . | . | N | V | . | . | . | . | . | M | . | . | . | . | . | . | .           |           |   |   |
| Lygaeus kalmii B           | . | . | T | S | . | E | . | . | S | S | . | H | . | . | V | . | . | . | . | . | . | . | . | . | . | . | . | N | V | . | . | . | . | . | M | . | . | . | . | . | . | .           |           |   |   |
| Oncopeltus fasciatus A     | . | . | T | S | . | . | . | . | A | S | . | N | H | . | . | V | . | . | . | . | . | . | . | . | . | . | . | N | V | . | A | . | . | E | . | . | Q | . | . | . | . | .           | .         |   |   |
| Lygaeus kalmii A           | . | . | T | S | . | . | . | . | A | S | . | N | H | . | . | V | . | . | . | . | . | . | . | . | . | . | . | N | V | . | A | . | . | M | . | . | . | Q | . | . | . | .           | .         | . |   |
| Phthiraptera               |   |   |   |   |   |   |   |   |   |   |   |   |   |   |   |   |   |   |   |   |   |   |   |   |   |   |   |   |   |   |   |   |   |   |   |   |   |   |   |   |   | 0           | 1         |   |   |
| Pediculus humanus corporis | . | . | L | . | . | . | . | . | . | . | . | . | . | . | . | . | . | . | . | . | . | . | . | . | . | . | . | . | . | . | . | . | . | . | . | M | . | . | . | . | . | .           | F         |   |   |
| Hymenoptera                |   |   |   |   |   |   |   |   |   |   |   |   |   |   |   |   |   |   |   |   |   |   |   |   |   |   |   |   |   |   |   |   |   |   |   |   |   |   |   |   |   | 2           | 20        |   |   |
| Neodiprion lecontei        | . | . | . | . | . | . | D | . | N | . | . | . | . | . | . | . | . | . | . | . | . | . | . | . | . | . | . | . | . | . | . | . | . | . | . | T | . | . | . | . | . | .           | .         |   |   |
| Athalia rosae              | . | . | . | . | . | . | D | . | N | . | . | . | . | . | . | . | . | . | . | . | . | . | . | . | . | . | . | . | . | . | . | . | . | . | . | . | . | . | . | . | . | .           | .         |   |   |
| Monophadnus latus          | . | . | T | . | . | L | . | . | S | N | . | H | . | . | . | . | . | . | . | . | . | . | . | . | . | . | . | . | M | . | . | . | . | . | . | T | . | . | . | . | . | .           | .         |   |   |
| Pachyprotasis variegata    | . | . | . | . | . | . | D | . | N | . | . | . | . | . | . | . | . | . | . | . | . | . | . | . | . | . | . | . | . | . | . | . | . | . | . | - | - | - | - | - | - | -           | -         |   |   |
| Cephus cinctus             | . | . | . | . | . | S | . | D | N | . | . | . | . | . | . | . | . | . | . | . | . | . | . | . | . | . | . | . | . | . | . | . | . | . | . | T | . | . | . | . | . | .           | .         |   |   |
| Diachasma alloeum          | . | . | . | . | . | S | . | D | N | . | . | . | . | . | . | . | . | . | . | . | . | . | . | . | . | . | . | . | . | . | . | . | . | . | . | T | . | . | . | . | . | .           | .         |   |   |
| Microplitis demolitor      | . | . | . | . | . | S | . | D | N | . | . | . | . | . | . | . | . | . | . | . | . | . | . | . | . | . | . | . | . | . | . | . | . | . | . | R | . | . | . | . | . | .           | .         |   |   |
| Ceratosolen solmsi         | . | . | H | . | . | S | . | D | A | N | E | . | D | . | . | . | . | . | . | . | . | . | . | . | . | . | . | . | . | . | . | . | . | . | T | . | . | . | . | . | . | .           |           |   |   |
| Copidosoma floridanum      | . | . | . | . | . | S | D | . | N | . | . | . | . | . | . | . | . | . | . | . | . | . | . | . | . | . | . | . | . | . | . | . | . | . | . | R | . | . | . | . | . | .           | .         |   |   |
| Polistes canadensis        | . | . | . | . | . | S | . | D | N | . | . | . | . | . | . | . | . | . | . | . | . | . | . | . | . | . | . | . | . | . | . | . | . | . | . | . | . | . | . | . | . | .           | .         | . | . |
| Polistes dominula          | . | . | . | . | . | S | . | D | N | . | . | . | . | . | . | . | . | . | . | . | . | . | . | . | . | . | . | . | . | . | . | . | . | . | . | . | . | . | . | . | . | .           | .         | . | . |
| Harpegnathos saltator      | . | . | . | . | . | S | . | D | N | . | . | . | . | . | . | . | . | . | . | . | . | . | . | . | . | . | . | . | . | . | . | . | . | . | . | . | . | . | . | . | . | .           | .         | . | . |
| Dinoponera quadriceps      | . | . | . | . | . | S | . | D | N | . | . | . | . | . | . | . | . | . | . | . | . | . | . | . | . | . | . | . | . | . | . | . | . | . | . | . | . | . | . | . | . | .           | .         | . | . |
| Ooceraea biroi             | . | . | . | . | . | S | . | D | N | . | . | . | . | . | . | . | . | . | . | . | . | . | . | . | . | . | . | . | . | . | . |   |   |   |   |   |   |   |   |   |   |             |           |   |   |
