# Supplementary material for: Adaptive substitutions underlying cardiac glycoside insensitivity in insects exhibit epistasis in vivo
Source: eLife journal article supplement (doi:10.7554/elife.48224), 2019-08-27
Supplement: supp [file elife_poa_e48224_Supplementary_file_1.xlsx]

## Sheet: Supplementary Table 1
Supplementary Table 1. Sources of sequence data used in this study
Species	Order	Method	Accession #	Reference or BioProject #
Gryllus firmus	Orthoptera	RNAseq de novo assembly	PRJNA198853	Yang et al. 2019
Tetrix japonica	Orthoptera	RNAseq de novo assembly	PRJNA295932	Yang et al. 2019
Romalea microptera	Orthoptera	RNAseq de novo assembly	PRJNA392010	Yang et al. 2019
Oedaleus asiaticus	Orthoptera	RNAseq de novo assembly	PRJNA338525	Yang et al. 2019
Locusta migratoria	Orthoptera	Sanger cDNA sequencing	KF813097.1	Bao, 2013
Aularches miliaris	Orthoptera	RNAseq de novo assembly	MK294065	Yang et al. 2019
Taphronota calliparea	Orthoptera	RNAseq de novo assembly	MK294066	Yang et al. 2019
Dictyophorus griseus	Orthoptera	RNAseq de novo assembly	MK294067	Yang et al. 2019
Chrotogonus hemipterus	Orthoptera	RNAseq de novo assembly	MK294068	Yang et al. 2019
Atractomorpha acutipennis	Orthoptera	RNAseq de novo assembly	MK294069	Yang et al. 2019
Ochrophlebia cafra	Orthoptera	RNAseq de novo assembly	MK294070	Yang et al. 2019
Sphenarium purpurascens	Orthoptera	RNAseq de novo assembly	MK294071	Yang et al. 2019
Zonocerus elegans	Orthoptera	RNAseq de novo assembly	MK294072	Yang et al. 2019
Poekilocerus pictus B	Orthoptera	RNAseq de novo assembly	MK294074	Yang et al. 2019
Phymateus leprosus B	Orthoptera	RNAseq de novo assembly	MK294073	Yang et al. 2019
Poekilocerus pictus A	Orthoptera	RNAseq de novo assembly	MK294076	Yang et al. 2019
Phymateus leprosus A	Orthoptera	RNAseq de novo assembly	MK294075	Yang et al. 2019
Mantis religiosa	Mantodea	RNAseq de novo assembly	PRJNA183205	Yang et al. 2019
Bemisia tabaci	Hemiptera	Query reference genome	XM_019041063.1	PRJNA352527
Nilaparvata lugens	Hemiptera	Query reference genome	XM_022328639.1	PRJNA398259
Rhodnius prolixus	Hemiptera	Query reference genome	KQ034075.1	PRJNA13648
Lygus hesperus	Hemiptera	RNAseq de novo assembly	GBRD01003681.1	PRJNA210219
Cimex lectularius	Hemiptera	Query reference genome	XM_014394884.2	PRJNA298750
Boisea trivittata	Hemiptera	RNAseq de novo assembly	JQ771499.1	Zhen et al. 2012
Leptocoris trivittatus	Hemiptera	RNAseq de novo assembly	JQ771499.1	Zhen et al. 2012
Pyrrhocoris apterus	Hemiptera	PCR-sequencing cDNA	HE956739.1	Dobler et al. 2012
Dysdercus cingulatus	Hemiptera	RNAseq de novo assembly	SRR5040256	PRJNA352589
Dysdercus fasciatus	Hemiptera	RNAseq de novo assembly	SRR489295	PRJNA77091
Macrocheraia grandis	Hemiptera	RNAseq de novo assembly	SRR5040251	PRJNA352589
Largus californicus	Hemiptera	RNAseq de novo assembly	SRR1821933	PRJNA272803
Largus sp.	Hemiptera	PCR-sequencing cDNA	HE956738.1	Dobler et al. 2012
Jalysus sp.	Hemiptera	RNAseq de novo assembly	SRR1821926	PRJNA272253
Metatropis rufescens	Hemiptera	RNAseq de novo assembly	SRR2051503	PRJNA272197
Ischnodemus falicus	Hemiptera	RNAseq de novo assembly	SRR1821925	PRJNA272252
Gyndes sp.	Hemiptera	RNAseq de novo assembly	SRR5137185	PRJNA352589
Geocoris sp.	Hemiptera	RNAseq de novo assembly	SRR1821921	PRJNA272244
Oncopeltus fasciatus D	Hemiptera	RNAseq de novo assembly	MK765670	Yang et al. 2019
Oncopeltus fasciatus C	Hemiptera	RNAseq de novo assembly	JQ771518.1	Zhen et al. 2012
Lygaeus kalmii C	Hemiptera	RNAseq de novo assembly	JQ771515.1	Zhen et al. 2012
Oncopeltus fasciatus B	Hemiptera	RNAseq de novo assembly	JQ771519.1	Zhen et al. 2012
Lygaeus kalmii B	Hemiptera	RNAseq de novo assembly	JQ771514.1	Zhen et al. 2012
Oncopeltus fasciatus A	Hemiptera	RNAseq de novo assembly	JQ771520.1	Zhen et al. 2012
Lygaeus kalmii A	Hemiptera	RNAseq de novo assembly	JQ771513.1	Zhen et al. 2012
Pediculus humanus corporis	Phthiraptera	Query reference genome	XM_002427669.1	Kirkness et al. 2007
Neodiprion lecontei	Hymenoptera	Query reference genome	XM_015658649.1	PRJNA312506
Athalia rosae	Hymenoptera	Query reference genome	XM_012414228.2	PRJNA282653
Monophadnus latus	Hymenoptera	RNAseq de novo assembly	SRR9586628	This study
Pachyprotasis variegata	Hymenoptera	PCR-sequencing cDNA	LN736263.1	Dobler et al. 2015
Cephus cinctus	Hymenoptera	Query reference genome	XM_015729628.2	PRJNA297591
Diachasma alloeum	Hymenoptera	Query reference genome	XM_015265214.1	PRJNA306876
Microplitis demolitor	Hymenoptera	Query reference genome	XM_008550885.1	PRJNA251518
Ceratosolen solmsi	Hymenoptera	Query reference genome	XM_011505654.1	PRJNA277475
Copidosoma floridanum	Hymenoptera	Query reference genome	XM_014350407.2	PRJNA297581
Polistes canadensis	Hymenoptera	Query reference genome	XM_014749330.1	PRJNA301748
Polistes dominula	Hymenoptera	Query reference genome	XM_015323700.1	PRJNA307991
Harpegnathos saltator	Hymenoptera	Query reference genome	XM_025304334.1	PRJNA476946
Dinoponera quadriceps	Hymenoptera	Query reference genome	XM_014620740.1	PRJNA301625
Ooceraea biroi	Hymenoptera	Query reference genome	XM_011345351.3	PRJNA501908
Vollenhovia emeryi	Hymenoptera	Query reference genome	XM_012020948.1	PRJNA278668
Pogonomyrmex barbatus	Hymenoptera	Query reference genome	XM_011645049.2	PRJNA276107
Monomorium pharaonis	Hymenoptera	Query reference genome	XM_012678519.2	PRJNA479782
Wasmannia auropunctata	Hymenoptera	Query reference genome	XM_011708535.1	PRJNA279179
Atta cephalotes	Hymenoptera	Query reference genome	XM_012202049.1	PRJNA279976
Acromyrmex echinatior	Hymenoptera	Query reference genome	XM_011052414.1	PRJNA271903
Apis mellifera	Hymenoptera	Query reference genome	XM_020018205.1	PRJNA361278
Apis florea	Hymenoptera	Query reference genome	XM_012490248.1	PRJNA86991
Agrilus planipennis	Coleoptera	Query reference genome	XM_018472182.2	PRJNA343475
Onthophagus taurus	Coleoptera	Query reference genome	XM_023047807.1	PRJNA419349
Tribolium castaneum	Coleoptera	Query reference genome	XM_008198195.2	PRJNA15718
Aethina tumida	Coleoptera	Query reference genome	XM_020018205.1	PRJNA361278
Dendroctonus ponderosae	Coleoptera	Query reference genome	XM_019913697.1	PRJNA360270
Cyrtepistomus castaneus	Coleoptera	RNAseq de novo assembly	JQ771502.1	Zhen et al. 2012
Hylobius abietis	Coleoptera	RNAseq de novo assembly	SRR6765939	PRJNA435680
Rhyssomatus lineaticollis A	Coleoptera	RNAseq de novo assembly	JQ771524.1	Zhen et al. 2012
Rhyssomatus lineaticollis B	Coleoptera	RNAseq de novo assembly	JQ771523.1	Zhen et al. 2012
Tetraopes tetraophthalmus	Coleoptera	RNAseq de novo assembly	JQ771526.1	Zhen et al. 2012
Monochamus alternatus	Coleoptera	RNAseq de novo assembly	SRR2521326	PRJNA296776
Xylotrechus quadripes	Coleoptera	RNAseq de novo assembly	SRR7077078	PRJNA450234
Megacyllene robiniae	Coleoptera	RNAseq de novo assembly	JQ771517.1	Zhen et al. 2012
Megacyllene caryae	Coleoptera	RNAseq de novo assembly	SRR1586007	PRJNA261846
Alticini sp.	Coleoptera	PCR-sequencing cDNA	HE956742.1	Dobler et al. 2012
Plagiodera versicolora	Coleoptera	RNAseq de novo assembly	JQ771522.1	Zhen et al. 2012
Gastrophysa viridula	Coleoptera	PCR-sequencing cDNA	HE956744.1	Dobler et al. 2012
Calligrapha philadelphica	Coleoptera	RNAseq de novo assembly	ERR1333730	PRJEB13133
Labidomera clivicollis	Coleoptera	RNAseq de novo assembly	JQ771511.1	Zhen et al. 2012
Leptinotarsa decemlineata	Coleoptera	Query reference genome	XM_023161024.1	PRJNA420356
Basilepta melanopus	Coleoptera	RNAseq de novo assembly	SRR8187395	PRJNA505379
Chrysochus asclepiadeus	Coleoptera	PCR-sequencing cDNA	HE956740.1	Dobler et al. 2012
Chrysochus auratus A	Coleoptera	RNAseq de novo assembly	JQ771500.1	Zhen et al. 2012
Chrysochus cobalitinus A	Coleoptera	RNAseq de novo assembly	MK765671	Yang et al. 2019
Chrysochus auratus B	Coleoptera	RNAseq de novo assembly	JQ771501.1	Zhen et al. 2012
Chrysochus cobalitinus B	Coleoptera	RNAseq de novo assembly	MK765672	Yang et al. 2019
Culex quinquefasciatus	Diptera	Query reference genome	NW_001886804.1	PRJNA29017
Aedes aegypti	Diptera	Query reference genome	NC_035107.1	PRJNA318737
Anopheles gambiae	Diptera	Query reference genome	XM_020076988.1	PRJNA357111
Liriomyza eupatorii	Diptera	PCR-sequencing cDNA	LT795109.1	Petschenka et al. 2017
Liriomyza sp.	Diptera	PCR-sequencing cDNA	HE956748.1	Dobler et al. 2012
Liriomyza asclepiadis	Diptera	RNAseq de novo assembly	MK294077	Yang et al. 2019
Chromatomyia horticola	Diptera	PCR-sequencing cDNA	LT795081.1	Petschenka et al. 2017
Phytomyza fallaciosa	Diptera	PCR-sequencing cDNA	LT795082.1	Petschenka et al. 2017
Phytomyza hellebori A	Diptera	PCR-sequencing cDNA	LT795110.1	Petschenka et al. 2017
Phytomyza hellebori B	Diptera	PCR-sequencing cDNA	LT795111.1	Petschenka et al. 2017
Phytomyza crassiseta	Diptera	PCR-sequencing cDNA	LT795078.1	Petschenka et al. 2017
Phytomyza ilicis	Diptera	PCR-sequencing cDNA	LT795077.1	Petschenka et al. 2017
Phytomyza digitalis	Diptera	PCR-sequencing cDNA	LT795083.1	Petschenka et al. 2017
Napomyza scrophulariae	Diptera	PCR-sequencing cDNA	LT795080.1	Petschenka et al. 2017
Napomyza lateralis	Diptera	PCR-sequencing cDNA	LT795079.1	Petschenka et al. 2017
Drosophila mojavensis	Diptera	Query reference genome	XM_015167953.1	PRJNA29977
Drosophila hydei	Diptera	Query reference genome	XM_023321093.1	PRJNA422293
Drosophila virilis	Diptera	Query reference genome	XM_002055964.2	PRJNA29995
Drosophila willistoni	Diptera	Query reference genome	XM_015177397.2	PRJNA29997
Drosophila subobscura QSN	Diptera	RNAseq de novo assembly	SRR9586630	This study
Drosophila subobscura QSH	Diptera	PCR-sequencing gDNA	KT318950.1	Pegueroles et al. 2016
Drosophila subobscura VSH	Diptera	PCR-sequencing cDNA	KT318946.1	Pegueroles et al. 2016
Drosophila guanche	Diptera	Query reference genome	GCA_900245975.1	Puerma et al. 2018
Drosophila obscura	Diptera	Query reference genome	XM_022353228.1	PRJNA399719
Drosophila miranda	Diptera	Query reference genome	XM_017286564.1	PRJNA325520
Drosophila pseudoobscura	Diptera	Query reference genome	XM_001358575.3	Drosophila 12 Genomes Consortium, 2007
Drosophila persimilis	Diptera	Query reference genome	XM_026985943.1	PRJNA501994
Drosophila serrata	Diptera	Query reference genome	XM_020943893.1	PRJNA384652
Drosophila melanogaster	Diptera	Query reference genome	FBgn0002921	ftp://ftp.flybase.net/releases/FB2019_01/
Drosophila simulans	Diptera	Query reference genome	XM_002102615.2	PRJNA297806
Drosophila sechellia	Diptera	Query reference genome	XM_002044256.1	Drosophila 12 Genomes Consortium, 2007
Drosophila erecta	Diptera	Query reference genome	XM_001979324.3	PRJNA501994
Drosophila yakuba	Diptera	Query reference genome	XM_015191921.1	PRJNA29999
Bactrocera cucurbitae	Diptera	Query reference genome	XM_011190816.1	PRJNA273817
Bactrocera oleae	Diptera	Query reference genome	XM_014232491.1	PRJNA293367
Bactrocera latifrons	Diptera	Query reference genome	XM_018929031.1	PRJNA351211
Bactrocera dorsalis	Diptera	Query reference genome	XM_011214825.2	PRJNA273958
Stomoxys calcitrans	Diptera	Query reference genome	XM_013260537.1	PRJNA288986
Musca domestica	Diptera	Query reference genome	XM_020037539.1	PRJNA210139
Lucilia bufonivora	Diptera	PCR-sequencing cDNA	HG938131.1	Mebs et al. 2014
Lucilia cuprina	Diptera	Query reference genome	XM_023439570.1	PRJNA423280
Plutella xylostella	Lepidoptera	Query reference genome	XM_011549930.1	PRJNA277936
Saucrobotys futilalis	Lepidoptera	PCR-sequencing cDNA	HE956749.1	Dobler et al. 2012
Daphnis nerii	Lepidoptera	RNAseq de novo assembly	MK294081	Yang et al. 2019
Bombyx mori	Lepidoptera	cDNA sequencing	LC029030.1	Homareda and Hara, unpublished
Empyreuma pugione	Lepidoptera	PCR-sequencing cDNA	LN736266.1	Dobler et al. 2015
Olepa ricini	Lepidoptera	RNAseq de novo assembly	MK294080	Yang et al. 2019
Lerina incarnata	Lepidoptera	PCR-sequencing cDNA	HE956754.1	Dobler et al. 2012
Pygoctenucha terminalis	Lepidoptera	PCR-sequencing cDNA	HE956753.1	Dobler et al. 2012
Syntomeida epilais	Lepidoptera	RNAseq de novo assembly	SRR9586629	This study
Lophocampa caryae	Lepidoptera	RNAseq de novo assembly	JQ771510.1	Zhen et al. 2012
Euchaetes egle	Lepidoptera	RNAseq de novo assembly	JQ771508.1	Zhen et al. 2012
Cycnia oregonensis	Lepidoptera	PCR-sequencing cDNA	HE956750.1	Dobler et al. 2012
Cycnia tenera	Lepidoptera	RNAseq de novo assembly	JQ771504.1	Zhen et al. 2012
Trichoplusia ni	Lepidoptera	Query reference genome	XM_026879049.1	PRJNA497582
Trichordestra legitima	Lepidoptera	RNAseq de novo assembly	JQ771525.1	Zhen et al. 2012
Helicoverpa armigera	Lepidoptera	Query reference genome	XM_021340407.1	PRJNA388211
Bicyclus anynana	Lepidoptera	Query reference genome	XM_024099163.1	PRJNA434100
Vanessa tameamea	Lepidoptera	Query reference genome	XM_026633901.1	PRJNA493654
Limenitis archippus	Lepidoptera	RNAseq de novo assembly	JQ771509.1	Zhen et al. 2012
Mechanitis polymnia	Lepidoptera	PCR-sequencing cDNA	HF945460.1	Petschenka et al. 2013
Lycorea halia	Lepidoptera	RNAseq de novo assembly	JQ771512.1	Zhen et al. 2012
Idea leuconoe	Lepidoptera	PCR-sequencing cDNA	HF945457.1	Petschenka et al. 2013
Euploea phaenareta	Lepidoptera	PCR-sequencing cDNA	HF945456.1	Petschenka et al. 2013
Euploea core core	Lepidoptera	RNAseq de novo assembly	MK294079	Yang et al. 2019
Ideopsis juventa	Lepidoptera	PCR-sequencing cDNA	HF945458.1	Petschenka et al. 2013
Parantica aglea	Lepidoptera	PCR-sequencing cDNA	HF945461.1	Petschenka et al. 2013
Amauris tartarea	Lepidoptera	PCR-sequencing cDNA	HF945450.1	Petschenka et al. 2013
Danaus genutia	Lepidoptera	PCR-sequencing cDNA	HF945453.1	Petschenka et al. 2013
Danaus gilippus	Lepidoptera	RNAseq de novo assembly	JQ771506.1	Zhen et al. 2012
Danaus chrysippus	Lepidoptera	RNAseq de novo assembly	MK294078	Yang et al. 2019
Danaus eresimus	Lepidoptera	RNAseq de novo assembly	JQ771505.1	Zhen et al. 2012
Danaus erippus	Lepidoptera	PCR-sequencing cDNA	HF945451.1	Petschenka et al. 2013
Danaus plexippus	Lepidoptera	RNAseq de novo assembly	JQ771507.1	Zhen et al. 2012
Tirumala septentrionis	Lepidoptera	PCR-sequencing cDNA	HF945464.1	Petschenka et al. 2013
Tirumala limniace	Lepidoptera	PCR-sequencing cDNA	HF945462.1	Petschenka et al. 2013
Tirumala petiverana	Lepidoptera	PCR-sequencing cDNA	HF945463.1	Petschenka et al. 2013
Pieris rapae	Lepidoptera	Query reference genome	XM_022259192.1	PRJNA397594
Papilio glaucus	Lepidoptera	RNAseq de novo assembly	JQ771498.1	Zhen et al. 2012
Papilio polytes	Lepidoptera	Query reference genome	XM_013283743.1	PRJNA291535
Papilio machaon	Lepidoptera	Query reference genome	XM_014516575.1	PRJNA300299
Papilio xuthus	Lepidoptera	Query reference genome	XM_013315255.1	PRJNA291600

## Sheet: Supplementary Table 2
Supplementary Table 2. References for the phylogenetic relationships of taxa used in this study.
Group	References
Insecta	1
Orthoptera	2–4
Hymenoptera	5–8
Hemiptera	9–12
Coleoptera	13,14
Diptera	15–20
Lepidoptera	21–26
NOTES: References
1	Misof, B. et al. Phylogenomics resolves the timing and pattern of insect evolution. Science 346, 763–767 (2014).
2	Song, H. et al. 300 million years of diversification: elucidating the patterns of orthopteran evolution based on comprehensive taxon and gene sampling. Cladistics 31, 621–651 (2015).
3	Song, H., Foquet, B., Mariño-Pérez, R. & Woller, D. A. Phylogeny of locusts and grasshoppers reveals complex evolution of density-dependent phenotypic plasticity. Sci Rep 7, 6606 (2017).
4	Yang, L. et al. Predictability in the evolution of Orthopteran cardenolide insensitivity. bioRxiv 542811 (2019). doi:10.1101/542811
5	Song, S.-N., Tang, P., Wei, S.-J. & Chen, X.-X. Comparative and phylogenetic analysis of the mitochondrial genomes in basal hymenopterans. Sci Rep 6, 20972 (2016).
6	Boevé, J.-L., Blank, S. M., Meijer, G. & Nyman, T. Invertebrate and avian predators as drivers of chemical defensive strategies in tenthredinid sawflies. BMC Evol. Biol. 13, 198 (2013).
7	Ward, P. S., Brady, S. G., Fisher, B. L. & Schultz, T. R. The evolution of myrmicine ants: phylogeny and biogeography of a hyperdiverse ant clade (Hymenoptera: Formicidae). Systematic Entomology 40, 61–81 (2015).
8	Ward, P. S. The Phylogeny and Evolution of Ants. Annual Review of Ecology, Evolution, and Systematics 45, 23–43 (2014).
9	Yuan, M.-L., Zhang, Q.-L., Guo, Z.-L., Wang, J. & Shen, Y.-Y. Comparative mitogenomic analysis of the superfamily Pentatomoidea (Insecta: Hemiptera: Heteroptera) and phylogenetic implications. BMC Genomics 16, 460 (2015).
10	Li, H. et al. Mitochondrial phylogenomics of Hemiptera reveals adaptive innovations driving the diversification of true bugs. Proc. Biol. Sci. 284, (2017).
11	Kikuchi, Y., Hosokawa, T. & Fukatsu, T. An ancient but promiscuous host-symbiont association between Burkholderia gut symbionts and their heteropteran hosts. ISME J 5, 446–460 (2011).
12	Cryan, J. R. & Urban, J. M. Higher-level phylogeny of the insect order Hemiptera: is Auchenorrhyncha really paraphyletic? Systematic Entomology 37, 7–21 (2012).
13	Zhang, S.-Q. et al. Evolutionary history of Coleoptera revealed by extensive sampling of genes and species. Nat Commun 9, 205 (2018).
14	Shin, S. et al. Phylogenomic Data Yield New and Robust Insights into the Phylogeny and Evolution of Weevils. Mol. Biol. Evol. 35, 823–836 (2018).
15	Junqueira, A. C. M. et al. Large-scale mitogenomics enables insights into Schizophora (Diptera) radiation and population diversity. Sci Rep 6, 21762 (2016).
16	Wiegmann, B. M. et al. Episodic radiations in the fly tree of life. Proc. Natl. Acad. Sci. U.S.A. 108, 5690–5695 (2011).
17	O’Grady, P. M. & DeSalle, R. Phylogeny of the Genus Drosophila. Genetics 209, 1–25 (2018).
18	Gao, J., Watabe, H., Aotsuka, T., Pang, J. & Zhang, Y. Molecular phylogeny of the Drosophila obscura species group, with emphasis on the Old World species. BMC Evol. Biol. 7, 87 (2007).
19	Williams, K. A., Lamb, J. & Villet, M. H. Phylogenetic radiation of the greenbottle flies (Diptera, Calliphoridae, Luciliinae). Zookeys 59–86 (2016). doi:10.3897/zookeys.568.6696
20	Arias-Robledo, G., Stark, T., Wall, R. L. & Stevens, J. R. The toad fly Lucilia bufonivora: its evolutionary status and molecular identification. Med. Vet. Entomol. 33, 131–139 (2019).
21	Zahiri, R. et al. A new molecular phylogeny offers hope for a stable family level classification of the Noctuoidea (Lepidoptera). Zoologica Scripta 40, 158–173 (2011).
22	Zahiri, R. et al. Molecular phylogenetics of Erebidae (Lepidoptera, Noctuoidea). Systematic Entomology 37, 102–124 (2012).
23	DaCosta, M. A., Larson, P., Donahue, J. P. & Weller, S. J. Phylogeny of Milkweed Tussocks (Arctiidae: Arctiinae: Phaegopterini) and Its Implications for Evolution of Ultrasound Communication. esaa 99, 723–742 (2006).
24	Zenker, M. M. et al. Systematics and origin of moths in the subfamily Arctiinae (Lepidoptera, Erebidae) in the Neotropical region. Zoologica Scripta 46, 348–362 (2017).
25	Aardema, M. L. & Andolfatto, P. Phylogenetic incongruence and the evolutionary origins of cardenolide-resistant forms of Na(+) ,K(+) -ATPase in Danaus butterflies. Evolution 70, 1913–1921 (2016).
26	Petschenka, G. et al. Stepwise evolution of resistance to toxic cardenolides via genetic substitutions in the Na+/K+ -ATPase of milkweed butterflies (lepidoptera: Danaini). Evolution 67, 2753–2761 (2013).

## Sheet: Supplementary Table 3
Supplementary Table 3. Transgenic strains generated in this study.
Line	Substitution(s)	Genotype	M/M	Bang Sensitivity		Ouabain Sensitivity
			viable?			(Adult Exposure)
				M/+	M/M	M/+	M/M
0	D2-6	w118;;D2-6/TM6	no	yes	.	.	.
1	None	w118;;GE-WT	yes	.	ref	.	ref
20	N122H	w118;;N122H/TM6	no	yes	.	+++	.
21	Q111L	w118;;Q111L/TM6	no	yes	.	+++	.
22	Q111T	w118;;Q111T/TM6	no	yes	.	.	.
23	Q111V	w118;;Q111V/TM6	no	yes	.	+++	.
24	C104Y	w118;;C104Y/TM6	no	yes	.	.	.
25	Q111T,N122H	w118;;Q111T, N122H/TM6	no	yes	.	.	.
26	Q111V,N122H	w118;; Q111V, N122H/TM6	no	yes	.	.	.
27	C104Y,N122Y	w118;;C104Y,N122Y/TM6	no	yes	.	.	.
28	N122Y	w118;;N122Y/TM6	no	yes	.	.	.
31	A119S	w118;;A119S	yes	no	yes	++	+
32	Q111L,A119S	w118;;Q111L,A119S	yes	no	yes	.	+
33	Q111V,A119S	w118;;Q111V,A119S	yes	no	yes	+	++
34	A119S,N122H	w118;;A119S,N122H	yes	no	yes	+	+
35	Q111T,A119S	w118;; Q111T,A119S	yes	no	yes	.	+
NOTE – “TM6” = TM6B, P{w[+mC]=Dfd-EYFP}3, Sb1,Tb1,ca1. D2-6 is a loss-of-function deletion. M/+ and M/M refer to heterozygous and
homozygous substitutions, respectively. Mut/+ were assayed such that the + allele is derived from line 1 (the engineered wild-type strain).
“ref” refers to the reference strain used for the assay. “.“ indicates genotypes that were not assayed. Sensitivity of adults to ouabain exposure
is qualitatively scored on a scale from highest = “+++” to lowest = “+”
