# Supplementary figures and images for: Adaptive substitutions underlying cardiac glycoside insensitivity in insects exhibit epistasis in vivo
Source: eLife journal article supplement (doi:10.7554/elife.48224), 2019-08-27

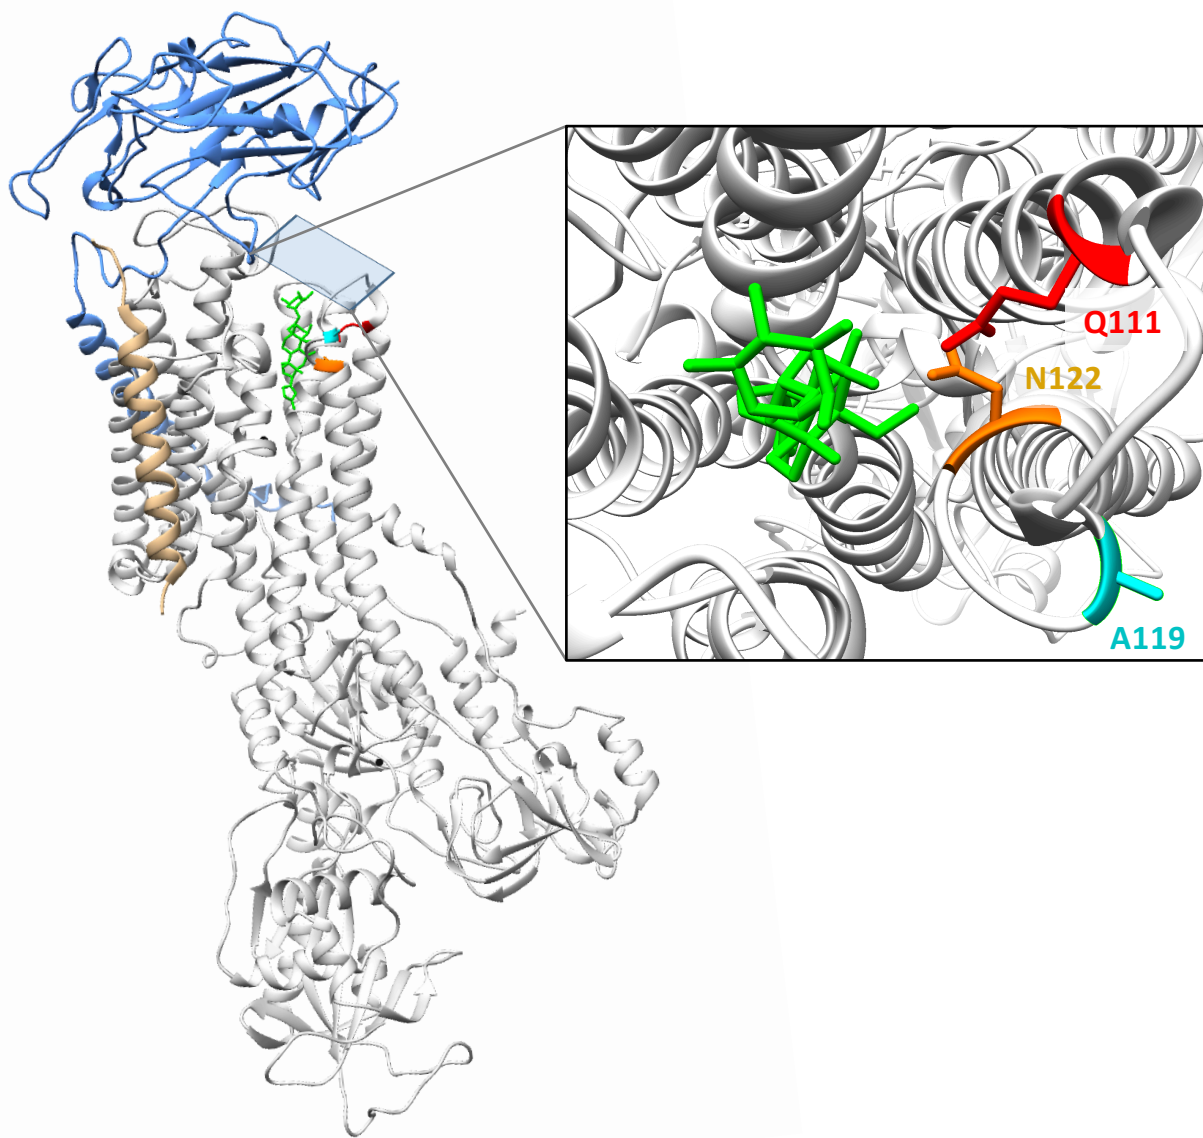

Figure 1 – figure supplement 5

Supplement: supp [file elife-48224-supp-v1.zip]

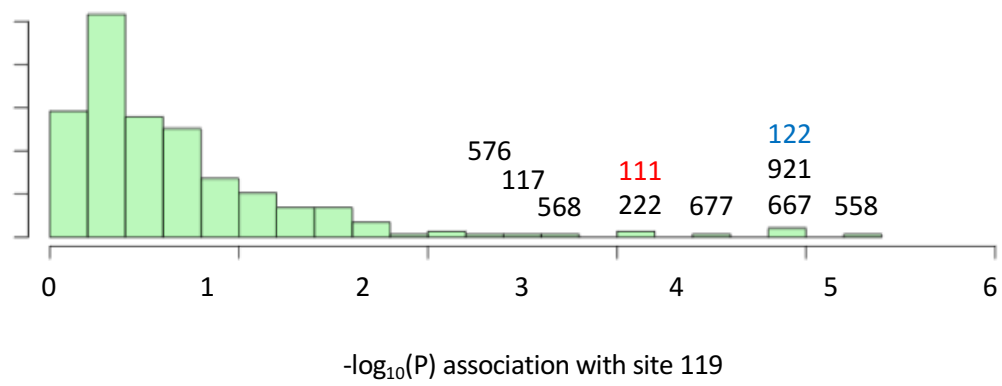

Figure 1 – figure supplement 4.

Supplement: supp [file elife-48224-supp-v1.zip]

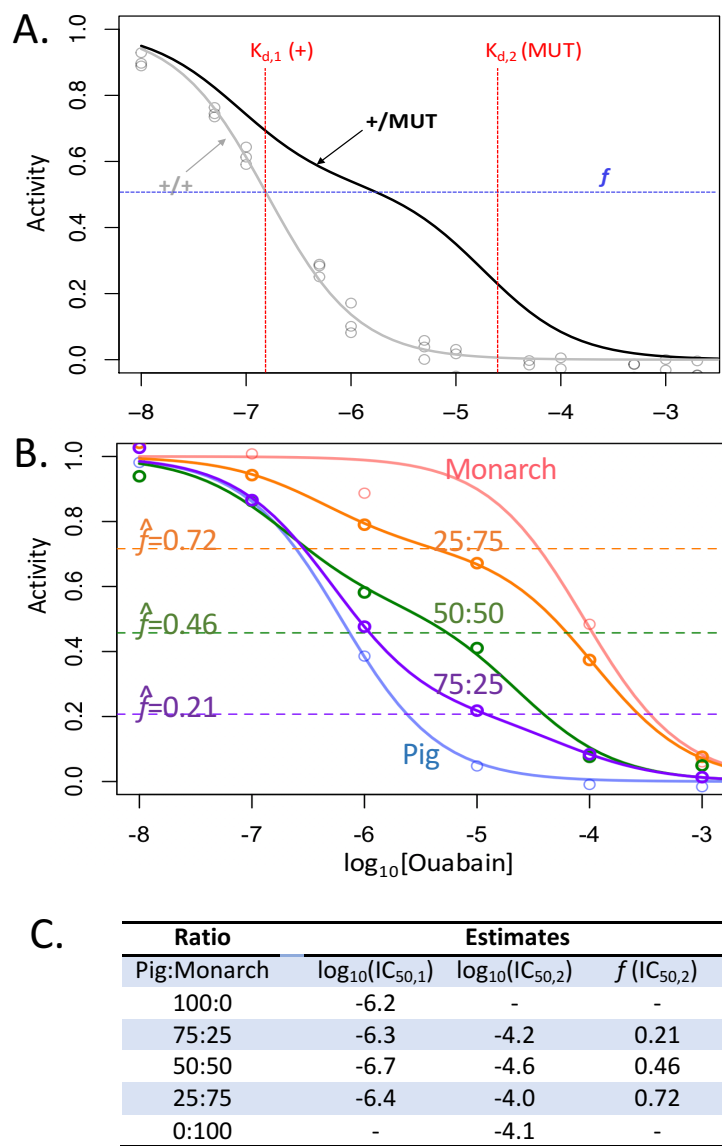

Figure 2 – figure supplement 1.

Supplement: supp [file elife-48224-supp-v1.zip]

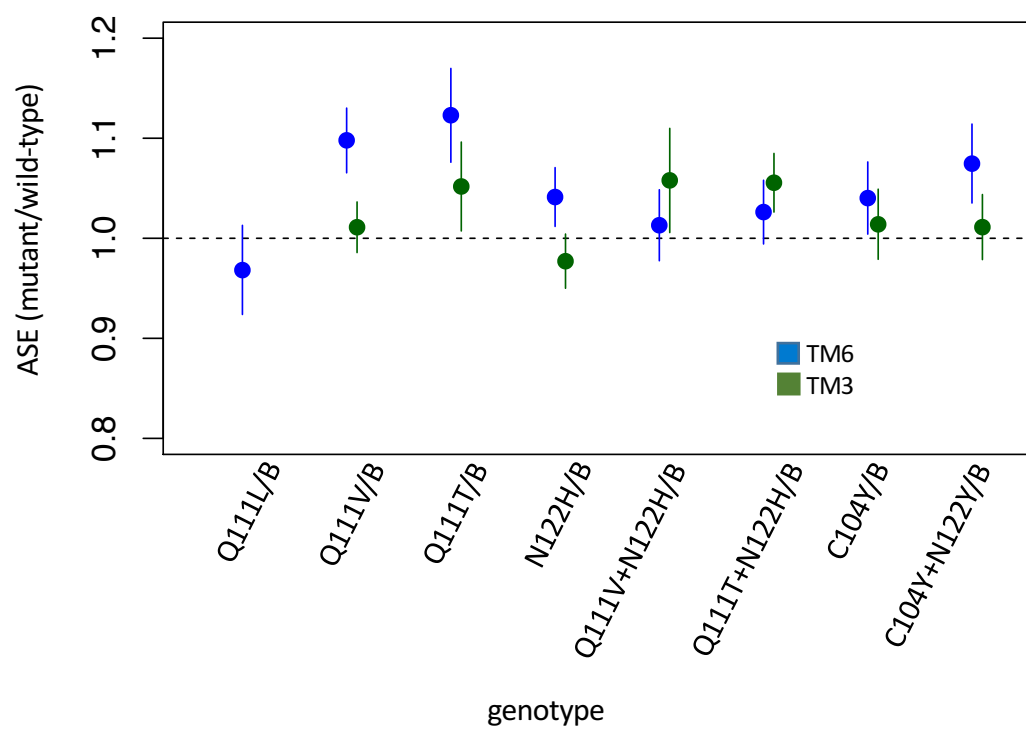

Figure 2 – figure supplement 2.

Supplement: supp [file elife-48224-supp-v1.zip]

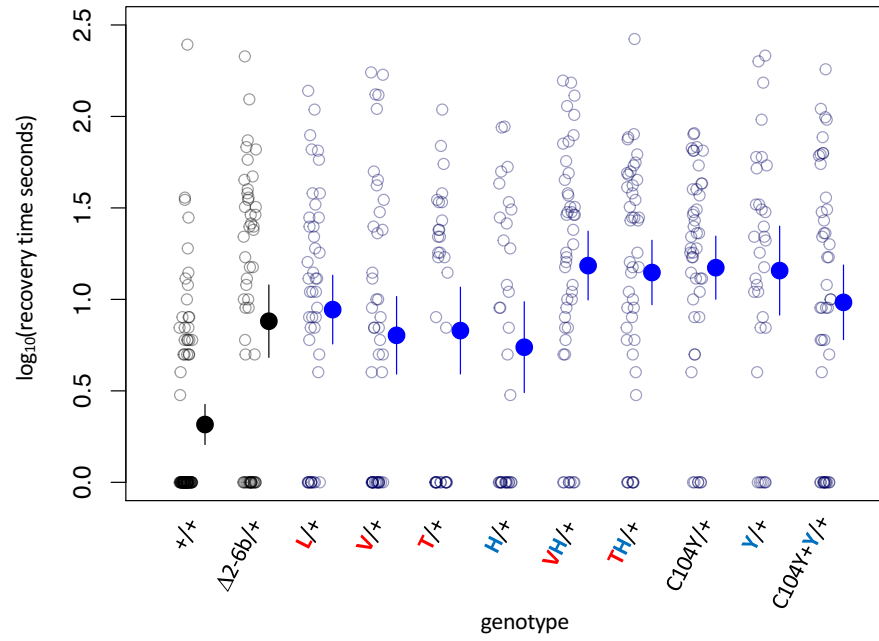

Figure 3 – figure supplement 1.

Supplement: supp [file elife-48224-supp-v1.zip]

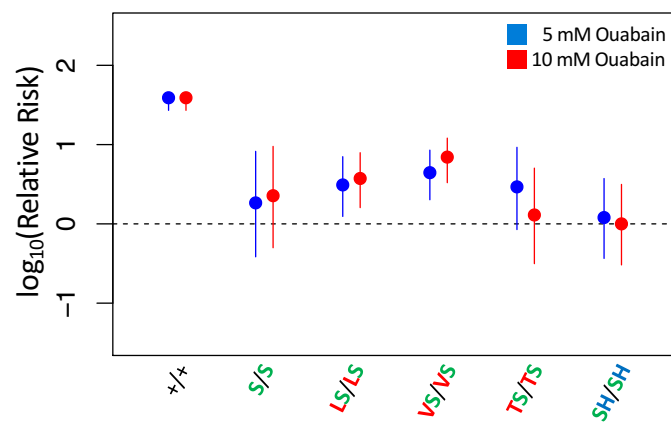

Figure 4 – figure supplement 1 .

Supplement: supp [file elife-48224-supp-v1.zip]

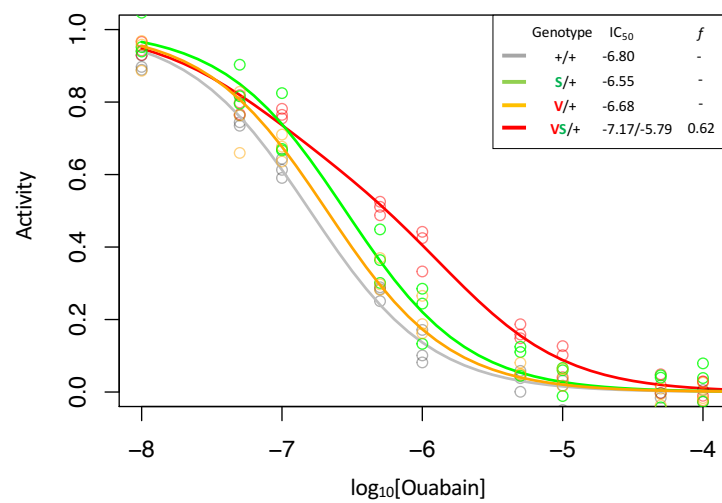

Figure 2 – figure supplement 3.

Supplement: supp [file elife-48224-supp-v1.zip]

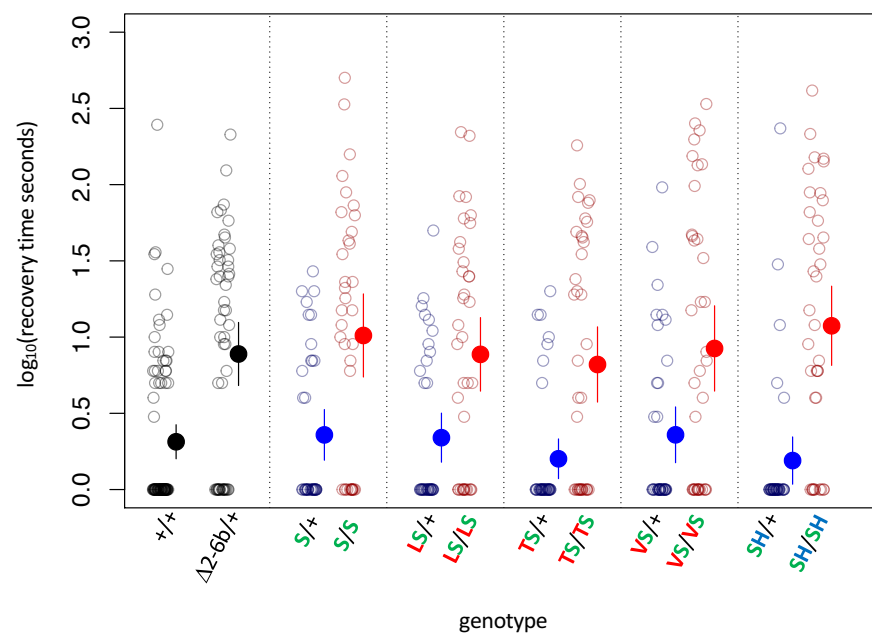

Figure 3 – figure supplement 2.

Supplement: supp [file elife-48224-supp-v1.zip]

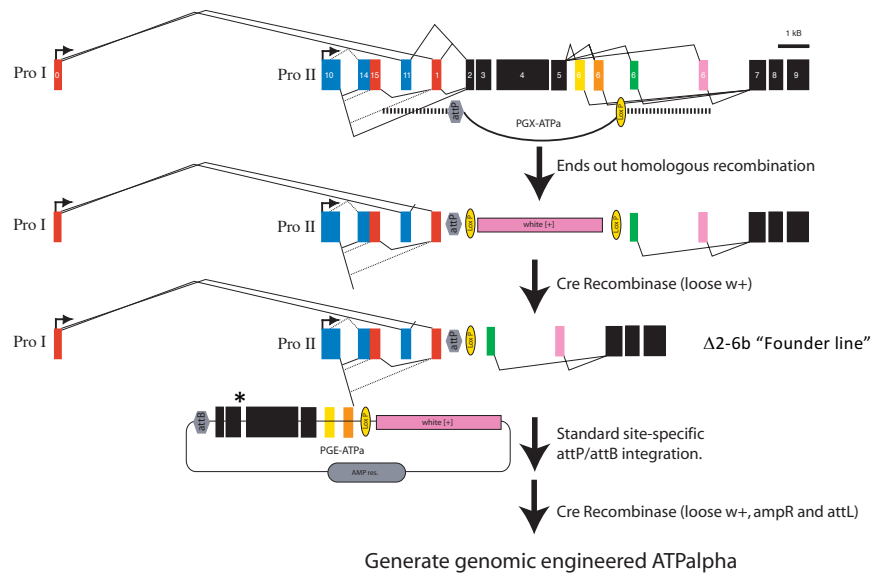

Figure 1 – figure supplement 1.

Supplement: supp [file elife-48224-supp-v1.zip]
